# Supplementary material
Source: MDPI journal article supplement (https://www.mdpi.com/2297-8739/9/12/442)
Supplement: s1 [file s1]

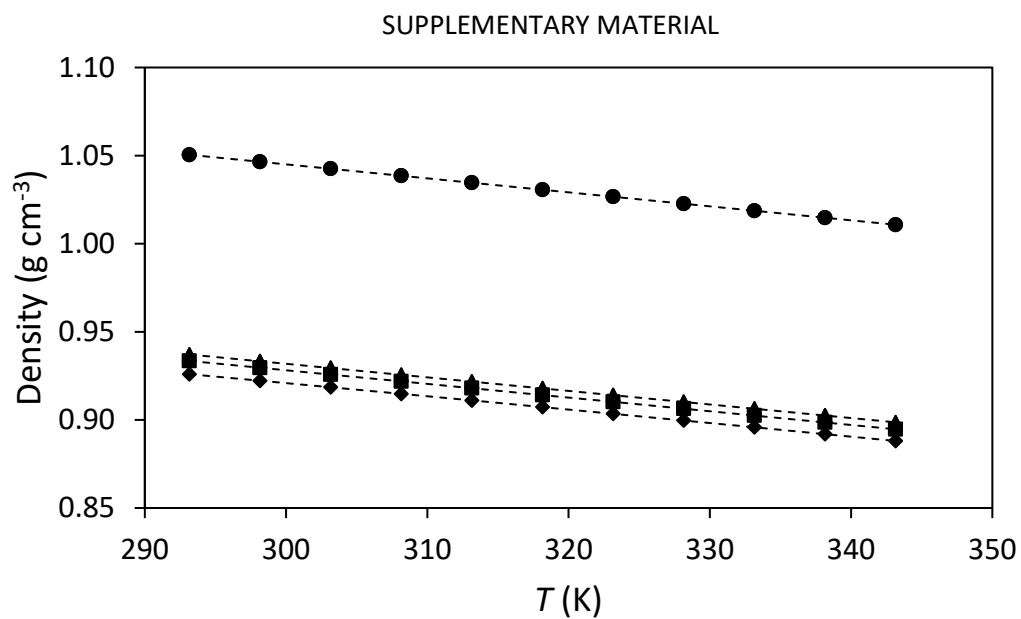

**Figure S1.** Density measured values for: T:D(1:1), (■); T:M(1:1), (▲); T:M(1:2), (◆) and T:C(2:1), (●); and linear regression (dashed lines) for the stable DESs.

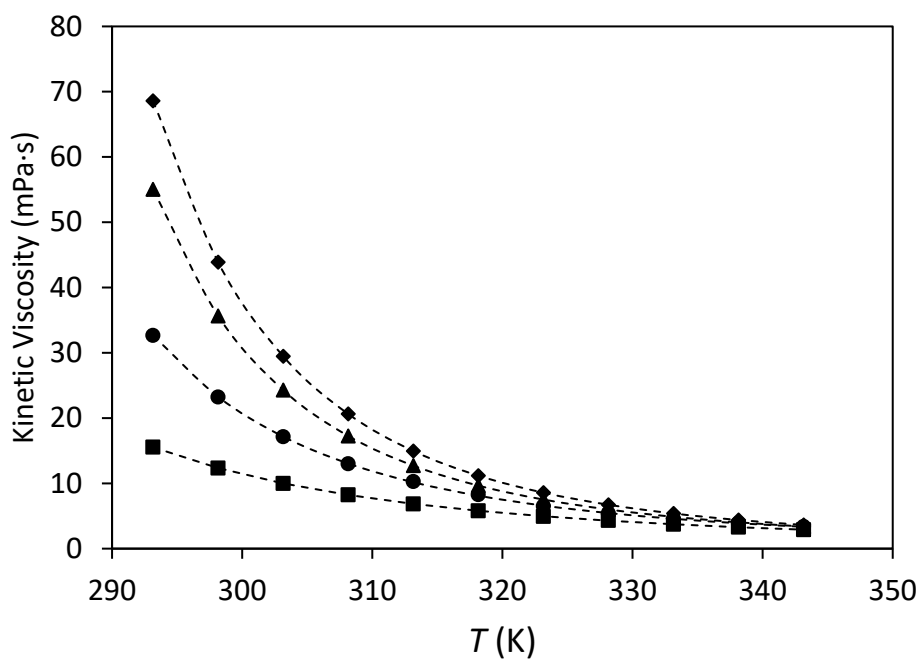

**Figure S2.** Kinetic Viscosity measured values for: T:D(1:1), (■); T:M(1:1), (▲); T:M(1:2), (◆) and T:C(2:1), (●); and VFT modelling (dashed lines) for the stable DESs.

**Table S1.** Structures of chemicals.

| Name             | CAS number | Structure                                                                            |
|------------------|------------|--------------------------------------------------------------------------------------|
| Thymol           | 89-83-9    | 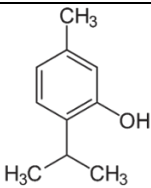   |
| Menthol          | 89-78-1    |    |
| Decanoic acid    | 334-48-5   |    |
| Coumarine        | 91-64-5    |    |
| Reactive Red 29  | 12226-09-4 |   |
| Acid Blue 113    | 3351-05-1  |  |
| Reactive Black 5 | 17095-24-8 |  |

|                        |               |                                                                                      |
|------------------------|---------------|--------------------------------------------------------------------------------------|
| Remazol Brilliant Blue | 2580-78-1     | 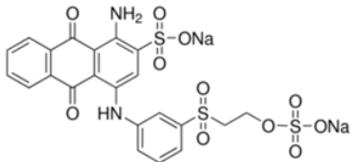   |
| Direct Yellow 27       | 10190-68-87   |    |
| Acid Blue 80           | 4474-24-2     |    |
| Direct Blue 15         | 2429-74-5     |    |
| Brilliant Blue G       | 6104-58-1     |   |
| Acid Violet 43         | 4430-18-6     |  |
| Malakita Green         | CAS 2437-29-8 |  |
| Acid Yellow 73         | 518-47-8      |  |

**Table S2.** Water content of the DES after saturation expressed as mass fraction.

| DES       | Water content<br>(mass fraction) |
|-----------|----------------------------------|
| T:D (1:1) | 0.037                            |
| T:M (1:1) | 0.022                            |
| T:M (1:2) | 0.021                            |
| T:C (2:1) | 0.027                            |

**Table S3.** Density of the stable DES after hydration, at temperatures ranging from 293,15 K to 343,15 K. Results are expressed as g cm<sup>-3</sup>.

| T (K)  | T:D (1:1) | T:M (1:1) | T:M (1:2) | T:C (2:1) |
|--------|-----------|-----------|-----------|-----------|
| 293.15 | 0.9334    | 0.9370    | 0.9259    | 1.0504    |
| 298.15 | 0.9296    | 0.9333    | 0.9223    | 1.0465    |
| 303.15 | 0.9257    | 0.9295    | 0.9185    | 1.0425    |
| 308.15 | 0.9219    | 0.9255    | 0.9148    | 1.0386    |
| 313.15 | 0.9180    | 0.9217    | 0.9110    | 1.0347    |
| 318.15 | 0.9141    | 0.9179    | 0.9073    | 1.0307    |
| 323.15 | 0.9103    | 0.9141    | 0.9035    | 1.0266    |
| 328.15 | 0.9064    | 0.9102    | 0.8997    | 1.0227    |
| 333.15 | 0.9025    | 0.9064    | 0.8958    | 1.0187    |
| 338.15 | 0.8986    | 0.9025    | 0.8919    | 1.0147    |
| 343.15 | 0.8946    | 0.8986    | 0.8880    | 1.0107    |

**Table S4.** Rate of change (g cm<sup>-3</sup> K<sup>-1</sup>), y-intercept (g cm<sup>-3</sup>) and coefficient of determination for the linear adjustment of the density data.

|           | a      | b       | R <sup>2</sup> |
|-----------|--------|---------|----------------|
| T:D (1:1) | 1.1610 | -0.0008 | 0.9999         |
| T:M (1:1) | 1.1627 | -0.0008 | 0.9999         |
| T:M (1:2) | 1.1519 | -0.0008 | 0.9999         |
| T:C (2:1) | 1.2832 | -0.0008 | 0.9999         |

**Table S5.** Kinetic viscosity of the stable DES after hydration, at temperatures ranging from 293.15 K to 343.5 K. Results are expressed as mPa·s.

| T (K)  | T:D (1:1) | T:M (1:1) | T:M (1:2) | T:C (2:1) |
|--------|-----------|-----------|-----------|-----------|
| 293.15 | 15.527    | 54.585    | 68.268    | 32.661    |
| 298.15 | 12.341    | 35.848    | 43.838    | 23.230    |
| 303.15 | 9.9886    | 24.756    | 29.574    | 17.137    |
| 308.15 | 8.2156    | 17.084    | 20.842    | 13.003    |
| 313.15 | 6.8546    | 12.639    | 14.973    | 10.263    |
| 318.15 | 5.7928    | 9.6282    | 11.224    | 8.2601    |
| 323.15 | 4.9519    | 7.5168    | 8.6627    | 6.4865    |
| 328.15 | 4.2772    | 5.9937    | 6.5782    | 5.3909    |
| 333.15 | 3.7291    | 4.8702    | 5.2827    | 4.5479    |
| 338.15 | 3.2789    | 4.0435    | 4.3144    | 3.8980    |
| 343.15 | 2.9055    | 3.3884    | 3.7394    | 3.3713    |

**Table S6.** Parameters for the adjustment of the kinetic viscosity data to a Volger-Fulcher-Tammann equation (VFT equation).

|                  | $\mu_0$ (mPa s) | B      | $T_0$ (K) | SD     | Nº Datos |
|------------------|-----------------|--------|-----------|--------|----------|
| <b>T:D (1:1)</b> | 0.0584          | 650.94 | 176.57    | 0.3039 | 11       |
| <b>T:M (1:1)</b> | 0.0496          | 530.71 | 217.46    | 0.7604 | 11       |
| <b>T:M (1:2)</b> | 0.0301          | 630.30 | 211.63    | 1.4442 | 11       |
| <b>T:C (2:1)</b> | 0.0632          | 544.17 | 206.04    | 0.9046 | 11       |

**Table S7.** Extraction efficiencies for all DESs and dyes under consideration at 50, 100, 200 and 500 mgL<sup>-1</sup>, in aqueous:organic ratio of 1:1.

|                               |                         | DES       |           |           |           |
|-------------------------------|-------------------------|-----------|-----------|-----------|-----------|
|                               |                         | T:D (1:1) | T:M (1:1) | T:M (1:2) | T:C (2:1) |
| Dye                           | Ci (mgL <sup>-1</sup> ) | % E       | % E       | % E       | % E       |
| <b>Reactive Red 29</b>        | 50                      | 16.6      | 13.4      | 3.8       | 5.5       |
|                               | 100                     | 7.3       | 13.3      | 5.6       | 6.8       |
|                               | 200                     | 9.7       | 9.6       | < 3       | 8.0       |
|                               | 500                     | 7.4       | 7.4       | 9.9       | 7.8       |
| <b>Acid Blue 113</b>          | 50                      | 13.3      | 5.9       | 4.0       | 4.1       |
|                               | 100                     | 6.5       | 5.2       | 4.0       | 8.4       |
|                               | 200                     | 4.6       | < 3       | 7.6       | 5.1       |
|                               | 500                     | 3.5       | < 3       | < 3       | < 3       |
| <b>Reactive Black 5</b>       | 50                      | 4.7       | < 3       | < 3       | < 3       |
|                               | 100                     | < 3       | < 3       | < 3       | < 3       |
|                               | 200                     | < 3       | < 3       | < 3       | < 3       |
|                               | 500                     | < 3       | < 3       | < 3       | < 3       |
| <b>Remazol Brilliant Blue</b> | 50                      | 7.3       | 6.3       | 17.3      | 25.1      |
|                               | 100                     | < 3       | < 3       | 3.5       | 12.9      |
|                               | 200                     | < 3       | < 3       | < 3       | 5.9       |
|                               | 500                     | < 3       | < 3       | < 3       | 6.4       |
| <b>Direct Yellow 27</b>       | 50                      | 5.5       | 23.6      | 5.9       | 9.9       |
|                               | 100                     | < 3       | 15.5      | 1.8       | 9.8       |
|                               | 200                     | < 3       | 8.5       | < 3       | 4.3       |
|                               | 500                     | < 3       | 8.4       | < 3       | < 3       |
| <b>Acid Blue 80</b>           | 50                      | < 3       | < 3       | < 3       | < 3       |
|                               | 100                     | < 3       | < 3       | < 3       | < 3       |
|                               | 200                     | < 3       | < 3       | < 3       | < 3       |
|                               | 500                     | < 3       | < 3       | < 3       | < 3       |
| <b>Direct Blue 15</b>         | 50                      | 6.3       | 13.1      | 11.0      | 14.7      |
|                               | 100                     | 9.1       | < 3       | < 3       | < 3       |
|                               | 200                     | < 3       | < 3       | < 3       | < 3       |
|                               | 500                     | < 3       | < 3       | < 3       | < 3       |
| <b>Brilliant Blue G</b>       | 50                      | 84.9      | 67.7      | 80.8      | 89.3      |
|                               | 100                     | 87.7      | 78.5      | 53.5      | 88.1      |
|                               | 200                     | 86.7      | 52.1      | 31.8      | 91.6      |
|                               | 500                     | 73.4      | 22.2      | 12.0      | 91.7      |

|                       |            |      |      |      |      |
|-----------------------|------------|------|------|------|------|
| <b>Acid Violet 43</b> | <b>50</b>  | 26.8 | < 3  | 4.5  | 22.3 |
|                       | <b>100</b> | 19.9 | < 3  | 10.4 | 19.2 |
|                       | <b>200</b> | 16.5 | < 3  | < 3  | 15.9 |
|                       | <b>500</b> | 17.2 | < 3  | < 3  | 12.1 |
| <b>Malakite Green</b> | <b>50</b>  | 99.9 | 93.8 | 80.5 | 96.2 |
|                       | <b>100</b> | 99.9 | 90.9 | 69.1 | 97.9 |
|                       | <b>200</b> | 99.9 | 88.1 | 61.5 | 98.9 |
|                       | <b>500</b> | 99.9 | 89.3 | 70.0 | 99.6 |
| <b>Acid Yellow 73</b> | <b>50</b>  | 94.8 | 7.9  | 26.1 | 14.1 |
|                       | <b>100</b> | 96.2 | 7.0  | 20.3 | 19.9 |
|                       | <b>200</b> | 95.2 | 5.8  | 13.4 | 11.2 |
|                       | <b>500</b> | 94.5 | < 3  | < 3  | < 3  |

**Table S8.** Cycle number, initial concentration  $C_0$ , final concentration  $C_f$ , extraction efficiency (%) and colour coordinates from the CIE 1976  $L^*a^*b^*$  system, for the extraction with T:D (1:1) for BBG, AY and MG at aqueous:organic ratio of 5:1, and AV aqueous:organic ratio of 1:1.

| Dye  | Cycle No. | $C_0$ (mg·L <sup>-1</sup> ) | $C_f$ (mg·L <sup>-1</sup> ) | EE (%) | Colour coordinates |        |        |
|------|-----------|-----------------------------|-----------------------------|--------|--------------------|--------|--------|
|      |           |                             |                             |        | L                  | a      | b      |
| BBG  | 1         | 113                         | 13.1                        | 88.4   | 73.94              | -11.57 | -16.45 |
| BBG  | 2         | 13.1                        | 6.30                        | 49.6   | 83.69              | -8.21  | -10.10 |
| BBG  | 3         | 6.30                        | 6.30                        | 0      | 87.77              | -6.49  | -8.42  |
| AY73 | 1         | 109                         | 6.30                        | 94.3   | 95.43              | -8.03  | 36.45  |
| AY73 | 2         | 6.30                        | 1.99                        | 56.3   | 98.83              | -1.76  | 6.46   |
| MG   | 1         | 102                         | 0.02                        | 99.8   | 99.95              | -0.05  | -0.43  |
| AV43 | 1         | 99.8                        | 31.1                        | 68.8   | 53.05              | 28.89  | -62.50 |
| AV43 | 2         | 31.1                        | 5.86                        | 81.0   | 85.74              | 3.37   | -5.41  |
| AV43 | 3         | 5.86                        | 1.13                        | 84.7   | 93.74              | -0.06  | -1.11  |

**Table S9.** Cycle number, initial concentration  $C_0$ , final concentration  $C_f$ , extraction efficiency (%) and colour coordinates from the CIE 1976  $L^*a^*b^*$  system, for the extraction with T:Cu (1:1) for BBG and MG at aqueous:organic ratio of 5:1, and AV at aqueous:organic ratio of 1:1.

| Dye  | Cycle No. | $C_0$ (mg·L <sup>-1</sup> ) | $C_f$ (mg·L <sup>-1</sup> ) | EE (%) | Colour coordinates |        |        |
|------|-----------|-----------------------------|-----------------------------|--------|--------------------|--------|--------|
|      |           |                             |                             |        | L                  | a      | b      |
| BBG  | 1         | 104                         | 14.7                        | 84.2   | 53.59              | -18.65 | -16.44 |
| BBG  | 2         | 14.7                        | 7.45                        | 51.3   | 78.03              | -12.93 | -9.41  |
| BBG  | 3         | 7.45                        | 5.58                        | 24.5   | 78.03              | -12.93 | -9.41  |
| BBG  | 4         | 5.58                        | 5.02                        | 21.7   | 87.44              | -7.49  | -8.23  |
| MG   | 1         | 102                         | 0.400                       | 99.6   | 99.49              | -0.38  | 0.10   |
| AV43 | 1         | 99.8                        | 40.9                        | 59.0   | 45.07              | 30.39  | -71.43 |
| AV43 | 2         | 40.9                        | 10.7                        | 73.9   | 92.51              | 3.48   | -6.87  |
| AV43 | 3         | 10.7                        | 1.55                        | 86.6   | 94.34              | -0.12  | 0.97   |

**Table S10.** Cycle number, initial concentration  $C_0$ , final concentration  $C_f$ , extraction efficiency (%) and colour coordinates from the CIE 1976  $L^*a^*b^*$  system, for the extraction with DES T:M (1:1) for BBG at DES:aqueous phase ratio 1:5.

| Dye | Cycle No. | $C_0$ (mg·L <sup>-1</sup> ) | $C_f$ (mg·L <sup>-1</sup> ) | EE (%) | Colour coordinates |        |        |
|-----|-----------|-----------------------------|-----------------------------|--------|--------------------|--------|--------|
|     |           |                             |                             |        | L                  | a      | b      |
| BBG | 1         | 98.7                        | 26.7                        | 72.9   | 32.11              | -9.25  | -14.77 |
| BBG | 2         | 26.7                        | 17.3                        | 39.5   | 48.22              | -6.51  | -6.79  |
| BBG | 3         | 17.3                        | 10.4                        | 39.7   | 71.14              | -11.25 | 0.72   |
| BBG | 4         | 10.4                        | 10.3                        | 1.5    | 70.86              | -10.95 | 0.65   |
